# Supplementary material for: Spatially restricted JAG1-Notch signaling in human thymus provides suitable DC developmental niches
Source: PubMed Central journal article supplement — J Exp Med. 2017 Nov 6;214(11):3361–79. doi: 10.1084/jem.20161564 (PMC5679173; doi:10.1084/jem.20161564), 2017-11-06
Supplement: JEM_20161564_sm.pdf [file JEM_20161564_sm.pdf]

SUPPLEMENTAL MATERIAL

Martín-Gayo et al., <https://doi.org/10.1084/jem.20161564>

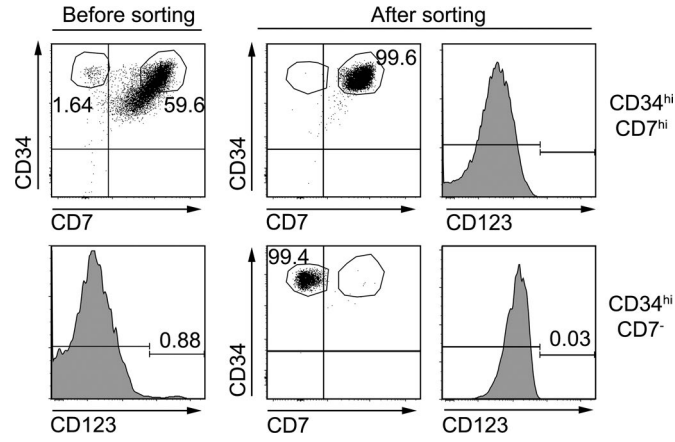

Figure S1. **Sorting strategy used to isolate CD7<sup>-</sup> and CD7<sup>hi</sup> ETPs depleted of CD123<sup>hi</sup> cells.** Flow cytometry analysis of CD7, CD34, and CD123 expression on total ETPs isolated from the human postnatal thymus by magnetic selection using anti-CD34-coated beads (left histograms). Right histograms show the phenotype of CD7<sup>-</sup> and CD7<sup>hi</sup> FACS-sorted CD34<sup>hi</sup> ETPs depleted CD123<sup>hi</sup> cells.
